# Supplementary material for: The Emergence and Fate of Horizontally Acquired Genes in Escherichia coli
Source: PubMed Central journal article supplement (PMC2275313; doi:10.1371/journal.pcbi.1000059), 2008-04-11
Supplement: pcbi.1000059.s005.pdf [file pcbi.1000059.s005.pdf]

**Supplementary Table S2. Rates of gain and loss of acquired genes in each lineage**

|                         | Branch        | Branch length          | Gains (kb) | Gain Rate* (kb/0.01) | Losses (kb) | Loss Rate* (kb/0.01) |
|-------------------------|---------------|------------------------|------------|----------------------|-------------|----------------------|
| <b>Clade</b>            | SCE           | 0.00408                | 118        | 289                  | 1.4         | 3                    |
|                         | SC            | 0.00185                | 6.1        | 33                   | 18          | 97                   |
|                         | S4            | 0.00138                | 4.8        | 35                   | 31          | 225                  |
|                         | S3            | 0.00145                | 0          | 0                    | 51          | 352                  |
|                         | S2            | 0.00498                | 21         | 42                   | 76          | 153                  |
|                         | S1            | 0.00039                | 5.9        | 151                  | 29          | 744                  |
|                         | C1            | 0.00427                | 23         | 54                   | 55          | 129                  |
|                         | E1            | 0.00406                | 132        | 325                  | 19          | 47                   |
|                         | E2            | 0.00232                | 28         | 121                  | 23          | 99                   |
|                         | U1            | 0.00136                | 26         | 191                  | 6.3         | 46                   |
|                         | U2            | 0.00642                | 117        | 182                  | 11          | 17                   |
|                         | <b>Strain</b> | <i>S. flexneri</i> 301 | 0.00019    | 5                    | 263         | 5                    |
| <i>S. flexneri</i> 2457 |               | 0.00021                | 0.5        | 24                   | 18          | 857                  |
| <i>S. flexneri</i> 8401 |               | 0.00044                | 4.4        | 100                  | 52          | 1182                 |
| <i>S. boydii</i>        |               | 0.00679                | 23         | 34                   | 65          | 96                   |
| <i>S. sonnei</i>        |               | 0.00340                | 21         | 62                   | 49          | 144                  |
| <i>S. dysenteriae</i>   |               | 0.00565                | 8.6        | 15                   | 163         | 288                  |
| <i>E. coli</i> K-12     |               | 0.00006                | 0          | 0                    | NA          | NA                   |
| <i>E. coli</i> W3110    |               | 0.00008                | 0          | 0                    | NA          | NA                   |
| <i>E. coli</i> EDL933   |               | 0.00018                | 4.5        | 250                  | 11          | 1833                 |
| <i>E. coli</i> Sakai    |               | 0.00006                | 20         | 3333                 | 19          | 1056                 |
| <i>E. coli</i> UTI89    |               | 0.00288                | 47         | 163                  | 30          | 104                  |
| <i>E. coli</i> CFT073   |               | 0.00315                | 55         | 175                  | 47          | 149                  |
| <i>E. coli</i> 536      |               | 0.00252                | 22         | 87                   | 33          | 131                  |

\* The gain (loss) rate is calculated as the amount of DNA gained (lost) in kilobases for a branch length of 0.01.
