# Supplementary material for: The Emergence and Fate of Horizontally Acquired Genes in Escherichia coli
Source: PubMed Central journal article supplement (PMC2275313; doi:10.1371/journal.pcbi.1000059), 2008-04-11
Supplement: pcbi.1000059.s006.pdf [file pcbi.1000059.s006.pdf]

**Supplementary Table S3. Mechanisms of inactivation of ORFans and HOPs**

|                         | ORFans* |    |    |    |    |     |   |   | HOPs* |   |    |    |   |     |   |   |
|-------------------------|---------|----|----|----|----|-----|---|---|-------|---|----|----|---|-----|---|---|
|                         | Total   | F  | IS | SC | T  | >=2 | D | I | Total | F | IS | SC | T | >=2 | D | I |
| <i>S. flexneri</i> 301  | 60      | 5  | 5  | 14 | 27 | 8   | 0 | 1 | 26    | 1 | 8  | 4  | 8 | 5   | 0 | 0 |
| <i>S. flexneri</i> 2457 | 70      | 8  | 7  | 18 | 30 | 6   | 0 | 1 | 32    | 2 | 12 | 7  | 6 | 5   | 0 | 0 |
| <i>S. flexneri</i> 8401 | 91      | 20 | 6  | 29 | 26 | 7   | 2 | 1 | 22    | 2 | 7  | 6  | 5 | 2   | 0 | 0 |
| <i>S. boydii</i>        | 55      | 4  | 10 | 7  | 29 | 4   | 0 | 1 | 17    | 1 | 10 | 2  | 3 | 1   | 0 | 0 |
| <i>S. sonnei</i>        | 47      | 4  | 10 | 7  | 21 | 5   | 0 | 0 | 28    | 2 | 13 | 1  | 5 | 4   | 3 | 0 |
| <i>S. dysenteriae</i>   | 62      | 2  | 22 | 4  | 29 | 3   | 2 | 0 | 16    | 2 | 8  | 2  | 1 | 3   | 0 | 0 |
| <i>E. coli</i> K-12     | 39      | 2  | 3  | 8  | 19 | 7   | 0 | 0 | 9     | 0 | 0  | 1  | 5 | 3   | 0 | 0 |
| <i>E. coli</i> W3110    | 37      | 1  | 1  | 9  | 20 | 6   | 0 | 0 | 9     | 0 | 0  | 1  | 5 | 3   | 0 | 0 |
| <i>E. coli</i> EDL933   | 33      | 3  | 2  | 4  | 19 | 5   | 0 | 0 | 1     | 0 | 0  | 0  | 0 | 1   | 0 | 0 |
| <i>E. coli</i> Sakai    | 27      | 1  | 0  | 4  | 18 | 4   | 0 | 0 | 3     | 0 | 0  | 0  | 2 | 1   | 0 | 0 |
| <i>E. coli</i> UTI89    | 28      | 2  | 0  | 4  | 16 | 6   | 0 | 0 | 2     | 1 | 0  | 0  | 1 | 0   | 0 | 0 |
| <i>E. coli</i> CFT073   | 37      | 4  | 2  | 6  | 21 | 4   | 0 | 0 | 10    | 6 | 0  | 1  | 2 | 0   | 1 | 0 |
| <i>E. coli</i> 536      | 50      | 11 | 0  | 11 | 16 | 9   | 2 | 1 | 8     | 0 | 0  | 1  | 3 | 2   | 1 | 1 |

\*Abbreviations are as follows:

F: Frameshift

IS: Insertion sequence

SC: Stop codon

T: Truncation

>=2: More than 1 type of mutation

D: Deletion

I: Insertion
