# Supplementary material for: The Emergence and Fate of Horizontally Acquired Genes in Escherichia coli
Source: PubMed Central journal article supplement (PMC2275313; doi:10.1371/journal.pcbi.1000059), 2008-04-11
Supplement: pcbi.1000059.s007.pdf [file pcbi.1000059.s007.pdf]

## ORFans

### Ancestral\_ORFans

NP\_751964.1  
NP\_751970.1  
NP\_751992.1  
NP\_751996.1  
NP\_752045.1  
NP\_752047.1  
NP\_752074.1  
NP\_752111.1  
NP\_752132.1  
NP\_752134.1  
NP\_752216.1  
NP\_752221.1  
NP\_752229.1  
NP\_752232.1  
NP\_752375.1  
NP\_752381.1  
NP\_752405.1  
NP\_752415.1  
NP\_752419.1  
NP\_752422.1  
NP\_752431.1  
NP\_752434.1  
NP\_752441.1  
NP\_752481.1  
NP\_752483.1  
NP\_752501.1  
NP\_752517.1  
NP\_752601.1  
NP\_752628.1  
NP\_752686.1  
NP\_752708.1  
NP\_752769.1  
NP\_752811.1  
NP\_752817.1  
NP\_752827.1  
NP\_752938.1  
NP\_752940.1  
NP\_752943.1  
NP\_752964.1  
NP\_752980.1  
NP\_753019.1  
NP\_753037.1  
NP\_753051.1  
NP\_753054.1  
NP\_753067.1  
NP\_753083.1  
NP\_753206.1  
NP\_753207.1  
NP\_753216.1  
NP\_753217.1  
NP\_753225.1

NP\_753228.1  
NP\_753230.1  
NP\_753248.1  
NP\_753277.1  
NP\_753278.1  
NP\_753285.1  
NP\_753312.1  
NP\_753315.1  
NP\_753331.1  
NP\_753333.1  
NP\_753340.1  
NP\_753341.1  
NP\_753352.1  
NP\_753366.1  
NP\_753382.1  
NP\_753427.1  
NP\_753444.1  
NP\_753494.1  
NP\_753523.1  
NP\_753525.1  
NP\_753529.1  
NP\_753541.1  
NP\_753558.1  
NP\_753560.1  
NP\_753588.1  
NP\_753607.1  
NP\_753648.1  
NP\_753656.1  
NP\_753666.1  
NP\_753667.1  
NP\_753685.1  
NP\_753739.1  
NP\_753805.1  
NP\_753812.1  
NP\_753825.1  
NP\_753875.1  
NP\_753884.1  
NP\_753936.1  
NP\_753941.1  
NP\_753942.1  
NP\_753956.1  
NP\_753965.1  
NP\_754013.1  
NP\_754016.1  
NP\_754024.1  
NP\_754043.1  
NP\_754063.1  
NP\_754095.1  
NP\_754097.1  
NP\_754114.1  
NP\_754151.1  
NP\_754158.1  
NP\_754180.1

NP\_754192.1  
NP\_754209.1  
NP\_754210.1  
NP\_754220.1  
NP\_754243.1  
NP\_754260.1  
NP\_754263.1  
NP\_754267.1  
NP\_754330.1  
NP\_754334.1  
NP\_754373.1  
NP\_754393.1  
NP\_754422.1  
NP\_754428.1  
NP\_754462.1  
NP\_754500.1  
NP\_754512.1  
NP\_754533.1  
NP\_754534.1  
NP\_754535.1  
NP\_754536.1  
NP\_754550.1  
NP\_754554.1  
NP\_754569.1  
NP\_754574.1  
NP\_754591.1  
NP\_754613.1  
NP\_754614.1  
NP\_754628.1  
NP\_754634.1  
NP\_754635.1  
NP\_754641.1  
NP\_754671.1  
NP\_754700.1  
NP\_754723.1  
NP\_754742.1  
NP\_754773.1  
NP\_754785.1  
NP\_754795.1  
NP\_754800.1  
NP\_754845.1  
NP\_754874.1  
NP\_754875.1  
NP\_754898.1  
NP\_754904.1  
NP\_754927.1  
NP\_754928.1  
NP\_754965.1  
NP\_754994.1  
NP\_755057.1  
NP\_755096.1  
NP\_755101.1  
NP\_755102.1

NP\_755115.1  
NP\_755130.1  
NP\_755217.1  
NP\_755219.1  
NP\_755232.1  
NP\_755239.1  
NP\_755246.1  
NP\_755341.1  
NP\_755361.1  
NP\_755362.1  
NP\_755394.1  
NP\_755401.1  
NP\_755420.1  
NP\_755505.1  
NP\_755536.1  
NP\_755547.1  
NP\_755550.1  
NP\_755682.1  
NP\_755697.1  
NP\_755700.1  
NP\_755702.1  
NP\_755706.1  
NP\_755712.1  
NP\_755745.1  
NP\_755815.1  
NP\_755838.1  
NP\_755870.1  
NP\_755876.1  
NP\_755891.1  
NP\_756032.1  
NP\_756038.1  
NP\_756039.1  
NP\_756046.1  
NP\_756059.1  
NP\_756094.1  
NP\_756105.1  
NP\_756111.1  
NP\_756114.1  
NP\_756150.1  
NP\_756162.1  
NP\_756164.1  
NP\_756165.1  
NP\_756167.1  
NP\_756171.1  
NP\_756172.1  
NP\_756173.1  
NP\_756174.1  
NP\_756200.1  
NP\_756214.1  
NP\_756215.1  
NP\_756225.1  
NP\_756233.1  
NP\_756236.1

NP\_756253.1  
NP\_756282.1  
NP\_756297.1  
NP\_756299.1  
NP\_756334.1  
NP\_756432.1  
NP\_756439.1  
NP\_756444.1  
NP\_756466.1  
NP\_756471.1  
NP\_756483.1  
NP\_756503.1  
NP\_756505.1  
NP\_756546.1  
NP\_756562.1  
NP\_756579.1  
NP\_756639.1  
NP\_756662.1  
NP\_756665.1  
NP\_756666.1  
NP\_756668.1  
NP\_756700.1  
NP\_756714.1  
NP\_756757.1  
NP\_756814.1  
NP\_756819.1  
NP\_756825.1  
NP\_756850.1  
NP\_756851.1  
NP\_756852.1  
NP\_756860.1  
NP\_756896.1  
NP\_756903.1  
NP\_756907.1  
NP\_756917.1  
NP\_756927.1  
NP\_756977.1  
NP\_756980.1  
NP\_756983.1  
NP\_756985.1  
NP\_757077.1  
NP\_757169.1  
NP\_757171.1  
NP\_757190.1  
NP\_757246.1  
NP\_757259.1  
NP\_757262.1  
NP\_757294.1  
NP\_757310.1  
NP\_753314.1  
YP\_539866.1  
YP\_541279.1  
YP\_541470.1

AP\_004237.1  
AP\_001227.1  
AP\_001187.1  
AP\_000980.1  
AP\_002197.1  
AP\_002602.1  
AP\_004629.1  
AP\_000949.1  
AP\_001447.1  
AP\_001621.1  
AP\_001797.1  
YP\_409336.1  
YP\_688988.1  
YP\_689024.1  
NP\_837744.1  
NP\_838529.1  
NP\_836713.1  
NP\_705967.1  
NP\_706060.1  
NP\_707647.1  
NP\_707900.1  
NP\_708861.1  
NP\_708157.1  
YP\_401827.1  
YP\_401749.1  
YP\_401973.1  
YP\_402005.1  
YP\_402304.1  
YP\_402767.1  
YP\_403379.1  
YP\_403434.1  
YP\_403744.1  
YP\_403753.1  
YP\_403756.1  
YP\_403757.1  
YP\_403977.1  
YP\_404133.1  
YP\_405107.1  
YP\_405602.1  
YP\_405935.1  
YP\_405219.1  
NP\_309640.1  
BAB35084.1  
NP\_309700.1  
NP\_309864.1  
BAB35362.1  
NP\_310917.1  
BAB36907.1  
BAB37214.1  
NP\_311961.1  
NP\_288149.1  
NP\_285693.1  
NP\_287934.1

NP\_288626.1  
NP\_286076.1  
NP\_286308.1  
NP\_286336.1  
NP\_287023.1  
NP\_287631.1  
NP\_288050.1  
NP\_288330.1  
NP\_288716.1  
NP\_288961.1  
NP\_289174.1  
NP\_289213.1  
NP\_289275.1  
NP\_289283.1  
NP\_289320.1  
NP\_289590.1  
NP\_289694.1  
NP\_289822.1  
NP\_289958.1  
NP\_290081.1  
NP\_290159.1  
YP\_667971.1  
YP\_668269.1  
YP\_668310.1  
YP\_668322.1  
YP\_668335.1  
YP\_668379.1  
YP\_668654.1  
YP\_668748.1  
YP\_669021.1  
YP\_669125.1  
YP\_669233.1  
YP\_669334.1  
YP\_669510.1  
YP\_669554.1  
YP\_669673.1  
YP\_669745.1  
YP\_669801.1  
YP\_669854.1  
YP\_669893.1  
YP\_669946.1  
YP\_670060.1  
YP\_670295.1  
YP\_670373.1  
YP\_670532.1  
YP\_670564.1  
YP\_670821.1  
YP\_670898.1  
YP\_671243.1  
YP\_671729.1  
YP\_671732.1  
YP\_671859.1  
YP\_672099.1

YP\_672223.1  
YP\_672252.1  
YP\_672485.1  
YP\_672494.1  
YP\_310027.1  
YP\_313014.1  
YP\_539157.1  
YP\_539346.1  
YP\_539347.1  
YP\_539360.1  
YP\_539367.1  
YP\_539413.1  
YP\_539443.1  
YP\_539616.1  
YP\_539724.1  
YP\_539799.1  
YP\_539835.1  
YP\_540120.1  
YP\_540428.1  
YP\_540454.1  
YP\_540676.1  
YP\_540776.1  
YP\_540826.1  
YP\_540836.1  
YP\_540868.1  
YP\_540918.1  
YP\_540942.1  
YP\_540999.1  
YP\_541013.1  
YP\_541033.1  
YP\_541034.1  
YP\_541114.1  
YP\_541202.1  
YP\_541315.1  
YP\_541372.1  
YP\_541433.1  
YP\_541471.1  
YP\_541572.1  
YP\_541869.1  
YP\_541877.1  
YP\_541949.1  
YP\_542668.1  
YP\_542669.1  
YP\_542959.1  
YP\_542966.1  
YP\_543018.1  
YP\_543200.1  
YP\_543543.1  
YP\_543611.1  
YP\_543803.1  
NP\_752050.1  
NP\_756183.1  
NP\_755001.1



NP\_755744.1  
NP\_756488.1  
NP\_752338.1  
NP\_753317.1  
NP\_753316.1  
NP\_753343.1  
NP\_753961.1  
NP\_754420.1  
NP\_754501.1  
NP\_755653.1  
NP\_755708.1  
NP\_752435.1  
NP\_753521.1  
NP\_754794.1  
NP\_755618.1  
YP\_407073.1  
YP\_671960.1  
YP\_671468.1  
AP\_002044.1  
YP\_309675.1  
NP\_706055.1  
YP\_542142.1  
NP\_309419.1  
YP\_671691.1  
YP\_408355.1  
YP\_404330.1  
YP\_691047.1  
YP\_669266.1  
YP\_672141.1  
AP\_003992.1  
YP\_672196.1  
YP\_672493.1  
YP\_402511.1  
YP\_670078.1  
NP\_290835.1  
NP\_286307.1  
YP\_669723.1  
YP\_407475.1  
NP\_309760.1  
NP\_706509.1  
NP\_289692.1  
YP\_309668.1  
YP\_403263.1  
NP\_309733.1  
YP\_670894.1  
NP\_757238.1  
NP\_754012.1

**SCE\_ORFans**

YP\_409327.1  
YP\_410448.1  
YP\_690862.1  
YP\_691259.1

YP\_690523.1  
YP\_690834.1  
YP\_691148.1  
NP\_838195.1  
NP\_839634.1  
NP\_709283.1  
NP\_709865.1  
NP\_706944.1  
NP\_707671.2  
NP\_709872.1  
NP\_309801.1  
NP\_287685.1  
NP\_289205.1  
NP\_289718.1  
NP\_290681.1  
YP\_310877.1  
AP\_001193.1  
AP\_000720.1  
AP\_000721.1  
AP\_000979.1  
AP\_001632.1  
AP\_002093.1  
AP\_002349.1  
AP\_002548.1  
AP\_002945.1  
AP\_003229.1  
AP\_003413.1  
AP\_003418.1  
AP\_003423.1  
AP\_003424.1  
AP\_004304.1  
AP\_004303.1  
AP\_004115.1  
AP\_004548.1  
AP\_004704.1  
AP\_004817.1  
AP\_001021.1  
AP\_002078.1  
AP\_002148.1  
AP\_003227.1  
AP\_003228.1  
AP\_003231.1  
AP\_004715.1  
YP\_402912.1  
NP\_309389.1  
NP\_312214.1  
YP\_309055.1  
NP\_290183.1  
NP\_286637.1  
NP\_309603.1  
NP\_836519.1  
NP\_308978.1  
BAB34786.1

YP\_410344.1  
NP\_290515.1  
NP\_311891.1  
NP\_309270.1  
NP\_309115.1  
YP\_310820.1

#### **E1\_ORFans**

NP\_308262.1  
NP\_308266.1  
NP\_308267.1  
NP\_308299.1  
BAB33709.1  
BAB33731.1  
BAB33973.1  
BAB34027.1  
NP\_308631.1  
NP\_308831.1  
BAB34240.1  
NP\_308872.1  
NP\_308874.1  
NP\_308876.1  
NP\_308941.1  
BAB34479.1  
NP\_309088.1  
BAB34485.1  
NP\_309090.1  
BAB34489.1  
NP\_309097.1  
NP\_309099.1  
BAB34501.1  
NP\_309121.1  
NP\_309125.1  
NP\_309124.1  
NP\_309126.1  
NP\_309154.1  
NP\_309189.1  
NP\_309192.1  
NP\_309195.1  
NP\_309219.1  
NP\_309220.1  
NP\_309245.2  
NP\_309257.1  
NP\_309258.1  
NP\_309261.1  
NP\_309262.1  
BAB34729.1  
NP\_309342.1  
BAB34741.1  
NP\_309347.1  
BAB34752.1  
BAB34754.1  
NP\_309361.1

NP\_309384.1  
BAB34784.1  
BAB34808.1  
NP\_309543.1  
NP\_309544.1  
NP\_309553.1  
BAB34985.1  
BAB34986.1  
NP\_309596.1  
NP\_309605.1  
NP\_309607.1  
NP\_309612.1  
BAB35023.1  
NP\_309790.1  
BAB35233.1  
NP\_309839.1  
NP\_309976.1  
NP\_309979.1  
NP\_309987.1  
NP\_310009.1  
NP\_310169.1  
BAB35581.1  
NP\_310238.1  
NP\_310239.1  
NP\_310254.1  
NP\_310255.1  
NP\_310276.1  
NP\_310280.1  
NP\_310290.1  
BAB35689.1  
NP\_310298.1  
NP\_310309.1  
NP\_310310.1  
BAB36044.1  
BAB36071.1  
NP\_310741.1  
BAB36170.1  
NP\_310785.1  
NP\_310786.1  
NP\_310787.1  
NP\_310792.1  
BAB36257.1  
NP\_311006.1  
NP\_311018.1  
BAB36416.1  
BAB36431.1  
BAB36660.1  
NP\_311526.1  
BAB37268.1  
BAB37274.1  
NP\_311881.1  
NP\_312575.1  
NP\_312593.1

BAB38012.1  
NP\_312619.1  
NP\_312983.1  
NP\_313274.1  
NP\_313294.1  
NP\_313318.1  
NP\_313319.1  
NP\_288545.1  
NP\_285712.1  
NP\_285905.1  
NP\_285926.1  
NP\_285995.1  
NP\_285996.1  
NP\_286021.1  
NP\_286022.1  
NP\_286290.1  
NP\_286418.1  
NP\_286673.1  
NP\_286676.1  
NP\_286689.1  
NP\_286690.1  
NP\_286691.1  
NP\_286741.1  
NP\_287022.1  
NP\_287036.1  
NP\_287043.1  
NP\_287044.1  
NP\_287045.1  
NP\_287055.1  
NP\_287057.1  
NP\_287060.1  
NP\_287699.1  
NP\_287700.1  
NP\_287762.1  
NP\_287944.1  
NP\_287949.1  
NP\_288358.1  
NP\_288608.1  
NP\_288609.1  
NP\_288610.1  
NP\_288926.1  
NP\_288927.1  
NP\_288929.1  
NP\_289177.1  
NP\_289194.1  
NP\_289416.1  
NP\_289425.1  
NP\_289545.1  
NP\_289552.1  
NP\_289554.1  
NP\_289991.1  
NP\_290262.1  
NP\_290263.1

NP\_290264.1  
NP\_290266.1  
NP\_290270.1  
NP\_290274.1  
NP\_290278.1  
NP\_290285.1  
NP\_290287.1  
NP\_290289.1  
NP\_290306.1  
NP\_290307.1  
NP\_290342.1  
NP\_290353.1  
NP\_290367.1  
NP\_290571.1  
NP\_290903.1  
NP\_290907.1  
NP\_290909.1  
NP\_290911.1  
NP\_290923.1  
NP\_287951.1  
NP\_287952.1  
NP\_287959.1  
NP\_753114.1  
NP\_756379.1  
NP\_757038.1  
NP\_757054.1  
YP\_687843.1  
YP\_668263.1  
YP\_539555.1  
YP\_539929.1  
YP\_539930.1  
YP\_539976.1  
YP\_539977.1  
YP\_541693.1  
YP\_544068.1

#### **E2\_ORFans**

YP\_401954.1  
YP\_402021.1  
YP\_402023.1  
YP\_402052.1  
YP\_402474.1  
YP\_403256.1  
YP\_405553.1  
YP\_405587.1  
BAB33443.1  
NP\_309232.1  
NP\_309238.2  
NP\_309427.1  
NP\_310998.1  
NP\_311000.1  
NP\_312683.1  
BAB38081.1

NP\_312686.1  
NP\_312892.1  
NP\_285765.1  
NP\_285906.1  
NP\_285907.1  
NP\_285908.1  
NP\_286457.1  
NP\_286458.1  
NP\_286459.1  
NP\_286460.1  
NP\_286561.1  
NP\_287021.1  
NP\_287749.1  
NP\_287750.1  
NP\_287751.1  
NP\_288522.1  
NP\_289403.1  
NP\_289960.1  
NP\_289970.1  
NP\_290308.1  
NP\_290340.1  
NP\_290354.1  
NP\_290558.1  
NP\_290572.1  
NP\_309275.1  
NP\_309564.1  
NP\_290305.1  
NP\_286142.1  
YP\_408344.1  
YP\_408347.1  
YP\_539554.1  
YP\_539557.1

#### **S1\_ORFans**

NP\_708644.2  
NP\_707863.1  
NP\_838475.1  
YP\_177613.1  
NP\_707479.2  
NP\_707481.1  
NP\_707480.2  
YP\_177614.1  
AAN82069.1  
AAN79751.1  
AAN79750.1  
AAN82068.1

#### **S2\_ORFans**

NP\_838991.1  
YP\_688676.1  
NP\_706166.1  
NP\_707044.1  
NP\_708293.1

NP\_708292.1  
NP\_709258.1  
NP\_708290.1  
NP\_838007.1  
NP\_708294.2  
NP\_707925.1  
NP\_708778.1  
NP\_708291.1  
NP\_706527.1  
NP\_707102.1  
NP\_706217.1  
YP\_691179.1  
NP\_706216.1  
NP\_709261.1  
NP\_707506.1  
NP\_836749.1  
NP\_837650.1  
AAN80843.1  
NP\_706794.1  
NP\_706593.1

#### **S4\_ORFans**

NP\_838125.1  
NP\_707687.1  
NP\_837602.1  
NP\_836747.1  
NP\_707455.1  
SBO\_1928  
AAN79959.1  
AAN79887.1  
AAN79961.1

#### **SC\_ORFans**

BAE76391.1  
NP\_708751.1  
NP\_708750.1

#### **C1\_ORFans**

BAE76358.1  
BAE76701.1  
BAE76060.1  
BAE76702.1  
BAE76378.1  
BAE76704.1  
BAE76758.1  
BAE76473.1  
BAE76064.1  
BAE76682.1  
BAA35360.1  
BAE76419.1  
BAE76467.1  
BAE76683.1  
BAE76771.1



AAN81595.1  
AAG55022.1  
AAN81635.1

#### **U1\_ORFans**

AAN79645.1  
AAN83268.1  
AAN80069.1  
ABE06779.1  
ABE07198.1  
AAN78845.1  
AAN79996.1  
ABE06617.1  
ABE06767.1  
AAN79904.1  
AAN80014.1  
ABE06973.1  
AAN81651.1

#### **U2\_ORFans**

YP\_540133.1  
NP\_751965.1  
NP\_751982.1  
NP\_752029.1  
NP\_752032.1  
NP\_752087.1  
NP\_752088.1  
NP\_752123.1  
NP\_752124.1  
NP\_752242.1  
NP\_752243.1  
NP\_752244.1  
NP\_752245.1  
NP\_752246.1  
NP\_752247.1  
NP\_752248.1  
NP\_752256.1  
NP\_752273.1  
NP\_752305.1  
NP\_752331.1  
NP\_752332.1  
NP\_752335.1  
NP\_752571.1  
NP\_752579.1  
NP\_752738.1  
NP\_752739.1  
NP\_752740.1  
NP\_753138.1  
NP\_753139.1  
NP\_753163.1  
NP\_753169.1  
NP\_753379.1  
NP\_753380.1

NP\_753431.1  
NP\_753475.1  
NP\_753476.1  
NP\_753501.1  
NP\_753504.1  
NP\_753565.1  
NP\_753734.1  
NP\_753779.1  
NP\_753787.1  
NP\_753788.1  
NP\_753789.1  
NP\_753790.1  
NP\_754187.1  
NP\_754295.1  
NP\_754299.1  
NP\_754301.1  
NP\_754307.1  
NP\_754354.1  
NP\_754357.1  
NP\_754367.1  
NP\_754390.1  
NP\_754391.1  
NP\_754395.1  
NP\_754401.1  
NP\_754411.1  
NP\_754412.1  
NP\_754453.1  
NP\_754615.1  
NP\_754945.1  
NP\_754946.1  
NP\_755182.1  
NP\_755214.1  
NP\_755279.1  
NP\_755285.1  
NP\_755446.1  
NP\_755447.1  
NP\_755560.1  
NP\_755885.1  
NP\_756068.1  
NP\_756069.1  
NP\_756075.1  
NP\_756284.1  
NP\_756413.1  
NP\_756415.1  
NP\_756419.1  
NP\_756425.1  
NP\_756428.1  
NP\_756441.1  
NP\_756454.1  
NP\_756611.1  
NP\_756615.1  
NP\_756625.1  
NP\_756629.1

NP\_756829.1  
NP\_756885.1  
NP\_756894.1  
NP\_756895.1  
NP\_757007.1  
NP\_757017.1  
NP\_757019.1  
NP\_757031.1  
NP\_757042.1  
NP\_757047.1  
NP\_757048.1  
NP\_757199.1  
NP\_757280.1  
NP\_755458.1  
NP\_755468.1  
NP\_755463.1  
NP\_753151.1  
YP\_539293.1  
YP\_539331.1  
YP\_539544.1  
YP\_539545.1  
YP\_539819.1  
YP\_540324.1  
YP\_540411.1  
YP\_540716.1  
YP\_541207.1  
YP\_541245.1  
YP\_541258.1  
YP\_541261.1  
YP\_541264.1  
YP\_541905.1  
YP\_541906.1  
YP\_541912.1  
YP\_542087.1  
YP\_543840.1  
YP\_543841.1  
YP\_543854.1  
YP\_543855.1  
YP\_543857.1  
YP\_543858.1  
YP\_543866.1  
YP\_543868.1  
YP\_543879.1  
YP\_543891.1  
YP\_543892.1  
YP\_543895.1  
YP\_543901.1  
YP\_543916.1  
YP\_543927.1  
YP\_543928.1  
YP\_668056.1  
YP\_668214.1  
YP\_668216.1

YP\_668223.1  
YP\_668246.1  
YP\_668279.1  
YP\_669108.1  
YP\_669367.1  
YP\_669371.1  
YP\_669818.1  
YP\_669880.1  
YP\_669887.1  
YP\_669916.1  
YP\_669918.1  
YP\_669927.1  
YP\_669929.1  
YP\_669930.1  
YP\_669932.1  
YP\_670864.1  
YP\_670887.1  
YP\_670888.1  
YP\_671651.1  
YP\_671653.1  
YP\_671658.1  
YP\_671664.1  
YP\_671665.1  
YP\_671666.1  
YP\_672291.1  
YP\_672364.1  
YP\_672365.1  
YP\_672367.1  
YP\_672369.1  
YP\_672380.1  
YP\_672394.1  
YP\_672395.1  
YP\_672396.1  
YP\_672419.1  
YP\_672450.1  
YP\_672460.1  
YP\_670886.1  
YP\_541689.1  
YP\_312447.1

#### **Singleton\_ORFans**

YP\_539327.1  
YP\_539960.1  
YP\_539971.1  
YP\_539973.1  
YP\_539974.1  
YP\_539982.1  
YP\_540486.1  
YP\_540747.1  
YP\_541650.1  
YP\_541662.1  
YP\_541674.1  
YP\_541678.1

YP\_541982.1  
YP\_541986.1  
YP\_542007.1  
YP\_542188.1  
YP\_543876.1  
YP\_543957.1  
YP\_543990.1  
YP\_544047.1  
YP\_544061.1  
YP\_544093.1  
NP\_752199.1  
NP\_752223.1  
NP\_752224.1  
NP\_752225.1  
NP\_752226.1  
NP\_752227.1  
NP\_752236.1  
NP\_752237.1  
NP\_752258.1  
NP\_752264.1  
NP\_752268.1  
NP\_752282.1  
NP\_752285.1  
NP\_752287.1  
NP\_752290.1  
NP\_752295.1  
NP\_752296.1  
NP\_752874.1  
NP\_753103.1  
NP\_753129.1  
NP\_753131.1  
NP\_753132.1  
NP\_753134.1  
NP\_753268.1  
NP\_753324.1  
NP\_753325.1  
NP\_753326.1  
NP\_753328.1  
NP\_753329.1  
NP\_753394.1  
NP\_753395.1  
NP\_753397.1  
NP\_753407.1  
NP\_753416.1  
NP\_753434.1  
NP\_753435.1  
NP\_753437.1  
NP\_753987.1  
NP\_754059.1  
NP\_755088.1  
NP\_755123.1  
NP\_755150.1  
NP\_755151.1

NP\_755269.1  
NP\_755433.1  
NP\_755473.1  
NP\_755477.1  
NP\_755478.1  
NP\_755479.1  
NP\_755480.1  
NP\_755481.1  
NP\_755506.1  
NP\_755507.1  
NP\_755528.1  
NP\_755567.1  
NP\_756041.1  
NP\_756391.1  
NP\_756402.1  
NP\_756403.1  
NP\_756404.1  
NP\_756414.1  
NP\_756420.1  
NP\_756421.1  
NP\_756422.1  
NP\_756423.1  
NP\_757011.1  
NP\_757012.1  
NP\_757013.1  
NP\_757021.1  
NP\_757058.1  
NP\_757060.1  
NP\_757222.1  
NP\_757223.1  
NP\_757224.1  
NP\_757228.1  
YP\_407081.1  
YP\_407835.1  
YP\_408029.1  
YP\_408524.1  
YP\_408532.1  
YP\_409956.1  
YP\_410035.1  
YP\_410038.1  
YP\_410427.1  
YP\_687847.1  
YP\_689357.1  
YP\_689499.1  
YP\_402673.1  
YP\_403412.1  
YP\_403526.1  
YP\_404755.1  
YP\_404911.1  
NP\_309207.1  
NP\_309210.1  
NP\_309218.1  
BAB34621.1

NP\_312974.1  
NP\_312975.1  
NP\_312977.1  
NP\_312978.1  
NP\_312980.1  
NP\_312982.1  
NP\_312984.1  
NP\_312986.1  
NP\_313023.1  
YP\_668256.1  
YP\_669230.1  
YP\_670589.1  
YP\_670590.1  
YP\_670702.1  
YP\_670871.1  
YP\_670914.1  
YP\_670916.1  
YP\_670917.1  
YP\_671641.1  
YP\_671642.1  
YP\_671669.1  
YP\_671674.1  
YP\_671680.1  
YP\_671681.1  
YP\_671685.1  
YP\_671688.1  
YP\_671697.1  
YP\_671711.1  
YP\_671718.1  
YP\_310239.1  
YP\_310825.1  
YP\_310826.1  
YP\_310828.1  
YP\_311532.1  
YP\_311514.1

## **HOPs**

### **Ancestral\_HOPs**

YP\_541676.1  
YP\_541965.1  
YP\_541969.1  
YP\_541970.1  
YP\_541971.1  
YP\_541973.1  
YP\_541976.1  
YP\_541977.1  
YP\_541981.1  
YP\_542041.1  
YP\_542122.1  
YP\_542374.1  
YP\_543675.1  
NP\_754652.1  
NP\_752215.1

NP\_752222.1  
NP\_752284.1  
NP\_752294.1  
NP\_752404.1  
NP\_753095.1  
NP\_753122.1  
NP\_753135.1  
NP\_753192.1  
NP\_753198.1  
NP\_754304.1  
NP\_754378.1  
NP\_754385.1  
NP\_754410.1  
NP\_754413.1  
NP\_754414.1  
NP\_755122.1  
NP\_755124.1  
NP\_755216.1  
NP\_755218.1  
NP\_755319.1  
NP\_755321.1  
NP\_755334.1  
NP\_755373.1  
NP\_755424.1  
NP\_755455.1  
NP\_755476.1  
NP\_755527.1  
NP\_755543.1  
NP\_755544.1  
NP\_755549.1  
NP\_755590.1  
NP\_756361.1  
NP\_756383.1  
NP\_756426.1  
NP\_756430.1  
NP\_756431.1  
NP\_756594.1  
NP\_756595.1  
NP\_757003.1  
NP\_757004.1  
NP\_757008.1  
NP\_757046.1  
NP\_756331.1  
NP\_755705.1  
NP\_756190.1  
NP\_753818.1  
NP\_752340.1  
NP\_752376.1  
NP\_752508.1  
NP\_752584.1  
NP\_752776.1  
NP\_752819.1  
NP\_753684.1



NP\_753692.1  
NP\_753746.1  
NP\_753751.1  
NP\_753792.1  
NP\_753955.1  
NP\_753962.1  
NP\_754485.1  
NP\_754517.1  
NP\_754537.1  
NP\_754538.1  
NP\_754539.1  
NP\_754540.1  
NP\_754658.1  
NP\_754654.1  
NP\_754655.1  
NP\_754657.1  
NP\_754701.1  
NP\_754702.1  
NP\_755084.1  
NP\_755220.1  
NP\_755320.1  
NP\_755333.1  
NP\_755336.1  
NP\_755592.1  
NP\_755593.1  
NP\_755709.1  
NP\_755958.1  
NP\_756151.1  
NP\_756277.1  
NP\_756449.1  
NP\_756479.1  
NP\_756472.1  
NP\_756981.1  
NP\_756982.1  
NP\_757263.1  
NP\_757264.1  
NP\_754953.1  
NP\_755328.1  
NP\_755329.1  
NP\_755772.1  
YP\_668180.1  
YP\_669022.1  
YP\_670012.1  
YP\_670755.1  
YP\_670895.1  
YP\_670940.1  
YP\_671723.1  
YP\_672467.1  
NP\_285931.1  
NP\_286289.1  
NP\_286420.1  
NP\_287697.1  
NP\_288089.1

## SCE\_HOPs

NP\_290072.1  
NP\_286081.1  
NP\_285943.1  
NP\_288847.1  
NP\_290526.1  
NP\_289094.1  
NP\_289095.1  
NP\_289096.1  
NP\_289038.1  
NP\_286091.1  
NP\_286094.1  
NP\_290173.1  
NP\_286413.1  
NP\_290205.1  
NP\_287696.1  
NP\_288238.1  
NP\_288393.1  
NP\_289303.1  
NP\_289310.1  
NP\_289405.1  
NP\_289406.1  
NP\_289485.1  
NP\_290174.1  
NP\_290175.1  
NP\_290506.1  
NP\_290699.1  
NP\_290959.1  
NP\_287637.1  
NP\_289400.1  
NP\_289401.1  
NP\_285929.1  
NP\_285942.1  
NP\_286131.1  
NP\_286246.1  
NP\_286291.1  
NP\_286292.1  
NP\_286293.1  
NP\_287636.1  
NP\_287667.1  
NP\_287702.1  
NP\_287850.1  
NP\_288195.1  
NP\_288395.1  
NP\_288969.1  
NP\_289207.1  
NP\_289305.1  
NP\_289306.1  
NP\_289307.1  
NP\_289308.1  
NP\_289309.1  
NP\_289433.1

NP\_289971.1  
NP\_290007.1  
NP\_290055.1  
NP\_290162.1  
NP\_290568.1  
YP\_402505.1  
YP\_402718.1  
YP\_403587.1  
YP\_404287.1  
YP\_405647.1  
YP\_403787.1  
YP\_403786.1  
YP\_405236.1  
YP\_402318.1  
YP\_402406.1  
YP\_403334.1  
YP\_403523.1  
YP\_403549.1  
YP\_403701.1  
YP\_403980.1  
YP\_405038.1

#### **SC\_HOPs**

NP\_415805.1  
NP\_418261.1  
NP\_415216.2  
NP\_414753.1  
NP\_414706.2  
NP\_415260.1

#### **S1\_HOPs**

NP\_706163.1  
NP\_706261.1  
NP\_707926.2  
NP\_708782.1

#### **S2\_HOPs**

YP\_689523.1  
YP\_687785.1  
YP\_687787.1  
YP\_687788.1  
YP\_687786.1  
YP\_687800.1  
YP\_687796.1  
YP\_687892.1  
YP\_687969.1  
YP\_687970.1  
YP\_689355.1  
YP\_689378.1  
YP\_690844.1

#### **S4\_HOPs**

YP\_309706.1

YP\_312040.2  
YP\_313206.1  
YP\_313207.1

#### **C1\_HOPs**

NP\_417494.1  
NP\_416540.1  
NP\_418766.4  
NP\_418765.1  
NP\_415906.1  
NP\_415907.1  
NP\_415908.1  
NP\_415909.3  
NP\_415914.1  
NP\_415917.1  
NP\_418080.1  
NP\_418081.1  
NP\_415904.1  
NP\_416538.1  
NP\_415216.1  
NP\_416575.1  
NP\_416776.1  
NP\_417239.1  
NP\_417493.1  
YP\_588477.1  
NP\_415954.2

#### **E1\_HOPs**

NP\_290258.1  
NP\_290252.1  
NP\_290273.1  
NP\_290256.1  
NP\_290255.1  
NP\_290250.1  
NP\_290257.1  
NP\_286707.1  
NP\_287115.1  
NP\_286708.1  
NP\_287116.1  
NP\_286710.1  
NP\_287118.1  
NP\_286711.1  
NP\_287119.1  
NP\_286712.1  
NP\_287120.1  
NP\_286699.1  
NP\_287107.1  
NP\_286706.1  
NP\_287114.1  
NP\_286678.1  
NP\_287086.1  
NP\_286679.1  
NP\_287087.1

NP\_286680.1  
NP\_287088.1  
NP\_286677.1  
NP\_287085.1  
NP\_286681.1  
NP\_287089.1  
NP\_286682.1  
NP\_287090.1  
NP\_288541.1  
NP\_286088.1  
NP\_286451.1  
NP\_286671.1  
NP\_286701.1  
NP\_286703.1  
NP\_286704.1  
NP\_286705.1  
NP\_286736.1  
NP\_287039.1  
NP\_287059.1  
NP\_287079.1  
NP\_287109.1  
NP\_287111.1  
NP\_287112.1  
NP\_287113.1  
NP\_287144.1  
NP\_287316.1  
NP\_287604.1  
NP\_287605.1  
NP\_287945.1  
NP\_288200.1  
NP\_288607.1  
NP\_288721.1  
NP\_288928.1  
NP\_289176.1  
NP\_289178.1  
NP\_289192.1  
NP\_289195.1  
NP\_289196.1  
NP\_289197.1  
NP\_289198.1  
NP\_289199.1  
NP\_289413.1  
NP\_289414.1  
NP\_289415.1  
NP\_289419.1  
NP\_289423.1  
NP\_289426.1  
NP\_289429.1  
NP\_289544.1  
NP\_289553.1  
NP\_289557.1  
NP\_289558.1  
NP\_289990.1

NP\_290056.1  
NP\_290260.1  
NP\_290450.1  
NP\_290904.1  
NP\_290915.1  
NP\_290917.1  
NP\_290920.1  
NP\_290921.1  
NP\_290970.1

#### **E2\_HOPs**

YP\_402349.1  
YP\_402350.1  
YP\_402351.1  
YP\_402352.1  
YP\_403521.1  
YP\_403828.1  
YP\_403829.1  
YP\_404453.1  
YP\_405064.1  
YP\_405114.1  
YP\_405543.1

#### **U1\_HOPs**

YP\_539056.1  
YP\_539225.1  
YP\_539457.1  
YP\_539499.1  
YP\_539840.1  
YP\_540057.1  
YP\_540086.1  
YP\_540116.1  
YP\_540281.1  
YP\_540302.1  
YP\_540312.1  
YP\_540734.1  
YP\_541668.1  
YP\_541940.1  
YP\_541989.1  
YP\_542182.1  
YP\_542262.1  
YP\_542345.1  
YP\_542438.1  
YP\_542583.1  
YP\_542727.1  
YP\_542730.1  
YP\_542741.1  
YP\_542744.1  
YP\_542752.1  
YP\_542811.1  
YP\_542842.1  
YP\_543123.1  
YP\_543503.1

YP\_543628.1  
YP\_544008.1  
YP\_544058.1

## **U2\_HOPs**

YP\_667960.1  
YP\_668005.1  
YP\_668053.1  
YP\_668055.1  
YP\_668057.1  
YP\_668177.1  
YP\_668182.1  
YP\_668183.1  
YP\_668221.1  
YP\_668226.1  
YP\_668248.1  
YP\_668474.1  
YP\_668481.1  
YP\_668620.1  
YP\_669387.1  
YP\_669814.1  
YP\_669815.1  
YP\_669816.1  
YP\_669819.1  
YP\_669821.1  
YP\_669825.1  
YP\_669826.1  
YP\_669828.1  
YP\_669844.1  
YP\_669845.1  
YP\_669846.1  
YP\_669863.1  
YP\_669864.1  
YP\_669869.1  
YP\_669876.1  
YP\_669905.1  
YP\_669975.1  
YP\_669977.1  
YP\_669978.1  
YP\_670021.1  
YP\_670022.1  
YP\_670023.1  
YP\_670024.1  
YP\_670318.1  
YP\_670403.1  
YP\_670610.1  
YP\_670689.1  
YP\_670776.1  
YP\_670865.1  
YP\_670905.1  
YP\_670911.1  
YP\_670912.1  
YP\_671014.1

YP\_671556.1  
YP\_671735.1  
YP\_671885.1  
YP\_671886.1  
YP\_671894.1  
YP\_671902.1  
YP\_671903.1  
YP\_671904.1  
YP\_671958.1  
YP\_672010.1  
YP\_672081.1  
YP\_672293.1  
YP\_672294.1  
YP\_672342.1  
YP\_672393.1  
YP\_672408.1  
YP\_672411.1  
YP\_672412.1  
YP\_672413.1  
YP\_672458.1  
YP\_672477.1  
YP\_672558.1

#### **Singleton\_HOPs**

YP\_312670.1  
YP\_311520.1  
YP\_311521.1  
YP\_310951.1  
YP\_310952.1  
YP\_310953.1  
YP\_310954.1  
YP\_310955.1  
YP\_310959.1  
YP\_310241.1  
YP\_310548.1  
YP\_311519.1  
YP\_311533.1  
YP\_312665.1  
YP\_312666.1  
YP\_312667.1  
YP\_312668.1  
YP\_312669.1  
YP\_407149.1  
YP\_407255.1  
YP\_407402.1  
YP\_407601.1  
YP\_407602.1  
YP\_407603.1  
YP\_407605.1  
YP\_407679.1  
YP\_408536.1  
YP\_410036.1  
YP\_410416.1



YP\_410422.1  
YP\_410428.1  
YP\_410599.1  
YP\_407362.1  
YP\_407361.1  
YP\_407357.1  
YP\_407358.1  
YP\_687837.1  
YP\_687797.1  
YP\_687845.1  
YP\_687862.1  
YP\_688186.1  
NP\_708781.1  
NP\_838066.1  
NP\_838059.1  
NP\_838060.1  
NP\_838061.1  
NP\_838065.1  
NP\_838067.1  
NP\_838064.1  
YP\_403314.1  
YP\_403519.1  
YP\_403696.1  
YP\_404332.1  
YP\_404378.1  
YP\_405527.1  
YP\_405691.1  
YP\_405464.1  
NP\_308328.1  
NP\_309094.1  
NP\_309211.1  
NP\_309215.1  
NP\_309253.1  
NP\_310308.1  
NP\_311745.1  
NP\_312973.1  
NP\_312976.1  
NP\_312979.1  
NP\_312981.1  
NP\_312987.1  
NP\_312988.1  
NP\_312990.1  
NP\_312993.1  
NP\_312994.1  
NP\_312995.1  
NP\_312996.1  
NP\_312997.1  
NP\_312998.1  
NP\_312999.1  
NP\_313000.1  
NP\_313001.1  
NP\_313003.1  
NP\_313004.1

NP\_313005.1  
NP\_313007.1  
NP\_286600.1  
NP\_286665.1  
NP\_286960.1  
NP\_286961.1  
NP\_286971.1  
NP\_287073.1  
NP\_287324.1  
NP\_287617.1  
NP\_290449.1  
NP\_290490.1  
YP\_668902.1  
YP\_669056.1  
YP\_669057.1  
YP\_669064.1  
YP\_669820.1  
YP\_670480.1  
YP\_670481.1  
YP\_670592.1  
YP\_670599.1  
YP\_670693.1  
YP\_670698.1  
YP\_670701.1  
YP\_670891.1  
YP\_671643.1  
YP\_671702.1  
YP\_672388.1  
YP\_543983.1  
YP\_541686.1  
YP\_541688.1  
YP\_541656.1  
YP\_542356.1  
YP\_542357.1  
YP\_543184.1  
YP\_539261.1  
YP\_539262.1  
YP\_539263.1  
YP\_539325.1  
YP\_539329.1  
YP\_539911.1  
YP\_539912.1  
YP\_539913.1  
YP\_539914.1  
YP\_539915.1  
YP\_539916.1  
YP\_539917.1  
YP\_539952.1  
YP\_539963.1  
YP\_540153.1  
YP\_540154.1  
YP\_540485.1  
YP\_540503.1

YP\_540735.1  
YP\_540738.1  
YP\_540740.1  
YP\_540741.1  
YP\_540742.1  
YP\_540743.1  
YP\_540744.1  
YP\_540745.1  
YP\_540746.1  
YP\_541641.1  
YP\_541652.1  
YP\_541655.1  
YP\_541915.1  
YP\_541916.1  
YP\_541917.1  
YP\_541952.1  
YP\_542005.1  
YP\_542186.1  
YP\_542187.1  
YP\_542190.1  
YP\_542193.1  
YP\_542699.1  
YP\_542700.1  
YP\_542701.1  
YP\_542784.1  
YP\_542785.1  
YP\_542786.1  
YP\_543286.1  
YP\_543287.1  
YP\_543288.1  
YP\_543403.1  
YP\_543404.1  
YP\_543528.1  
YP\_543529.1  
YP\_543530.1  
YP\_543697.1  
YP\_544039.1  
NP\_752267.1  
NP\_752653.1  
NP\_752866.1  
NP\_752867.1  
NP\_752868.1  
NP\_752869.1  
NP\_752875.1  
NP\_752881.1  
NP\_753127.1  
NP\_753184.1  
NP\_753578.1  
NP\_753597.1  
NP\_753599.1  
NP\_753600.1  
NP\_753782.1  
NP\_753783.1

NP\_753784.1  
NP\_754291.1  
NP\_754396.1  
NP\_754738.1  
NP\_754775.1  
NP\_755025.1  
NP\_755087.1  
NP\_755270.1  
NP\_755472.1  
NP\_755508.1  
NP\_755511.1  
NP\_755556.1  
NP\_755557.1  
NP\_755558.1  
NP\_755979.1  
NP\_756371.1  
NP\_756372.1  
NP\_756374.1  
NP\_756375.1  
NP\_756387.1  
NP\_756395.1  
NP\_756399.1  
NP\_757069.1
