# Supplementary material for: The Emergence and Fate of Horizontally Acquired Genes in Escherichia coli
Source: PLoS Comput Biol. 2008 Apr 11;4(4):e1000059. doi: 10.1371/journal.pcbi.1000059 (PMC2275313; doi:10.1371/journal.pcbi.1000059)
Supplement: Table S1 — COG assignments of 652 HOPs. (0.04 MB PDF) [file pcbi.1000059.s004.pdf]

**Supplementary Table S1. COG assignments of 652 HOPs.**

| <b>COG Category</b>                                               | <b>Percentage of HOPs</b> |
|-------------------------------------------------------------------|---------------------------|
| <b>Information storage and processing</b>                         |                           |
| [J] Translation, ribosomal structure and biogenesis               | 3                         |
| [A] RNA processing and modification                               | 0                         |
| [K] Transcription                                                 | 10                        |
| [L] Replication, recombination and repair                         | 21                        |
| [B] Chromatin structure and dynamics                              | 0                         |
| <b>sub total</b>                                                  | <b>34 (5.2%)</b>          |
| <b>Cellular processes and signaling</b>                           |                           |
| [D] Cell cycle control, cell division, chromosome partitioning    | 1                         |
| [Y] Nuclear structure                                             | 0                         |
| [V] Defense mechanisms                                            | 4                         |
| [T] Signal transduction mechanisms                                | 10                        |
| [M] Cell wall/membrane/envelope biogenesis                        | 27                        |
| [N] Cell motility                                                 | 0                         |
| [Z] Cytoskeleton                                                  | 0                         |
| [W] Extracellular structures                                      | 0                         |
| [U] Intracellular trafficking, secretion, and vesicular transport | 5                         |
| [O] Posttranslational modification, protein turnover, chaperones  | 7                         |
| <b>sub total</b>                                                  | <b>54 (8.3%)</b>          |
| <b>Metabolism</b>                                                 |                           |
| [C] Energy production and conversion                              | 10                        |
| [G] Carbohydrate transport and metabolism                         | 10                        |
| [E] Amino acid transport and metabolism                           | 11                        |
| [F] Nucleotide transport and metabolism                           | 3                         |
| [H] Coenzyme transport and metabolism                             | 3                         |
| [I] Lipid transport and metabolism                                | 9                         |
| [P] Inorganic ion transport and metabolism                        | 8                         |
| [Q] Secondary metabolites biosynthesis, transport and catabolism  | 9                         |
| <b>sub total</b>                                                  | <b>63 (9.7%)</b>          |
| <b>Poorly Characterized</b>                                       |                           |
| [R] General function prediction only                              | 50                        |
| [S] Function unknown                                              | 50                        |
| no COG identified                                                 | 401                       |
| <b>sub total</b>                                                  | <b>501 (76.8%)</b>        |
| <b>Total</b>                                                      | <b>652 (100%)</b>         |
